# Supplementary material for: A comprehensive characterization of the impact of mycophenolic acid on the metabolism of Jurkat T cells
Source: PubMed Central journal article supplement (PMC5585210; doi:10.1038/s41598-017-10338-6), 2017-09-05
Supplement: 41598_2017_10338_MOESM1_ESM.pdf [file 41598_2017_10338_MOESM1_ESM.pdf]

## A comprehensive characterization of the impact of mycophenolic acid on the metabolism of proliferating T cells

Ana A. Fernández-Ramos,<sup>1,2</sup> Catherine Marchetti-Laurent,<sup>1,2</sup> Virginie Poindessous,<sup>1,2</sup> Samantha Antonio,<sup>2,3</sup> Céline Petitgas,<sup>2,5</sup> Irène Ceballos-Picot,<sup>2,5</sup> Pierre Laurent-Puig,<sup>1,2,4</sup> Sylvie Bortoli,<sup>2,3</sup> Marie-Anne Lorient,<sup>1,2,4†</sup> Nicolas Pallet<sup>1,2,4\*</sup>

### Supplementary Figure 1

**Figure S1. Full-length blots of p70s6k, Myc, HiF-1 $\alpha$  and actin after 24 and 48 hours of incubation.** A) Western Blot of p-p70s6k and actin after incubation for 24 hours with V (1<sup>st</sup> column), MPA (3<sup>rd</sup> column) and Rapa (4<sup>th</sup> column). B) Western Blot of HIF-1 $\alpha$ , Myc and actin after incubation for 24 hours with V (1<sup>st</sup> column), MPA (3<sup>rd</sup> column) and Rapa (4<sup>th</sup> column). C) Western Blot of p-p70s6k and actin after incubation for 48 hours with V (1<sup>st</sup> column), MPA (3<sup>rd</sup> column) and Rapa (4<sup>th</sup> column). D) Western Blot of HIF-1 $\alpha$ , Myc and actin after incubation for 48 hours with V (1<sup>st</sup> column), MPA (3<sup>rd</sup> column) and Rapa (4<sup>th</sup> column).

A)

24h

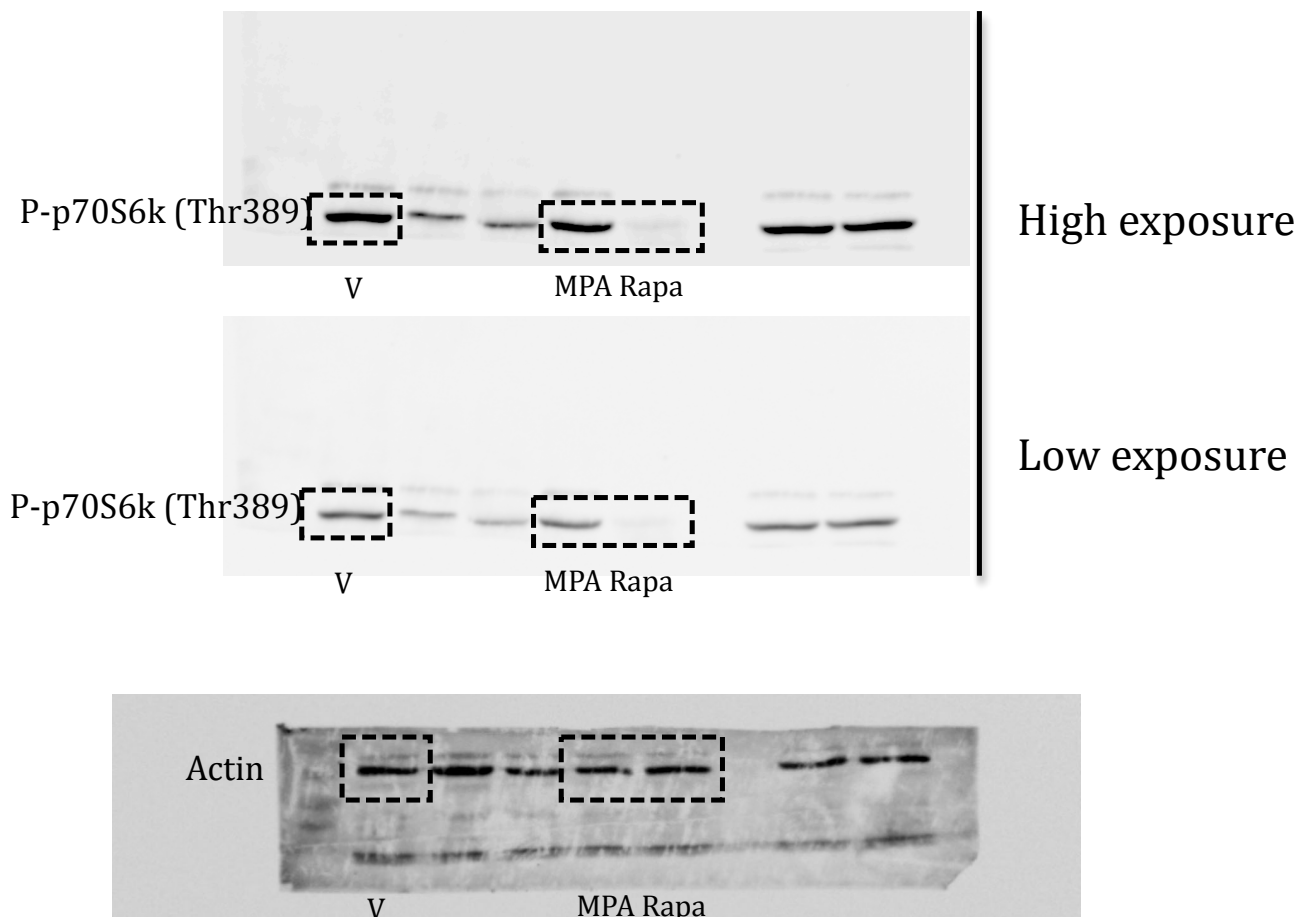

**B)**

**24h**

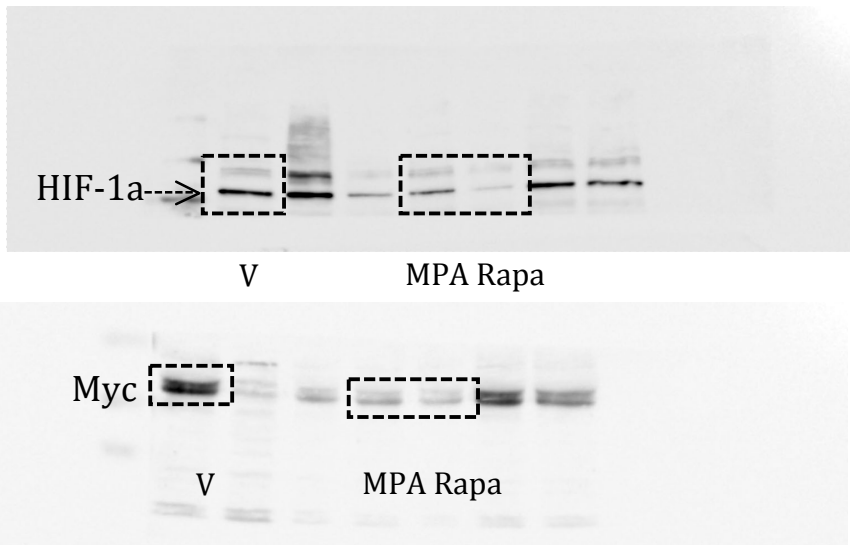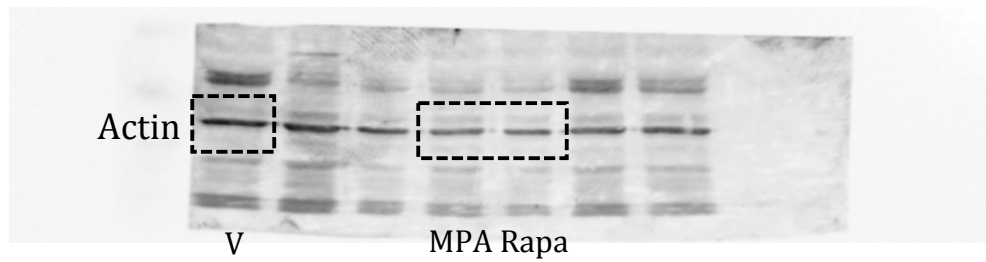

**C)**

**48h**

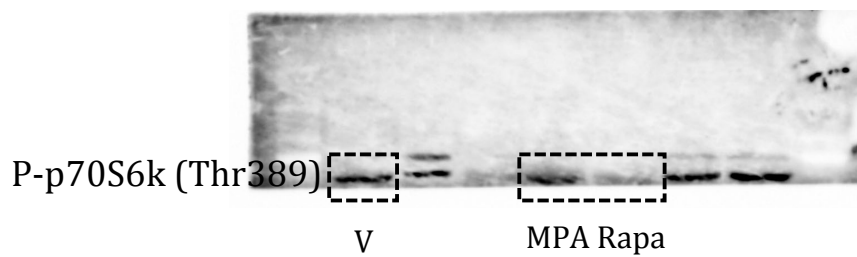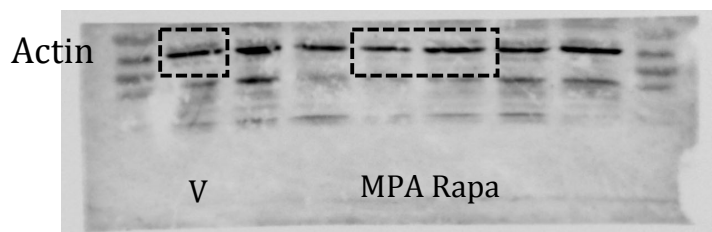

D)

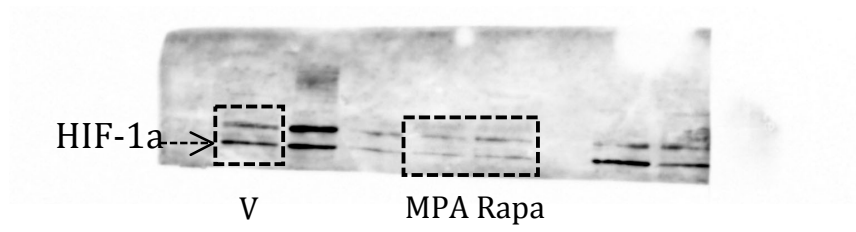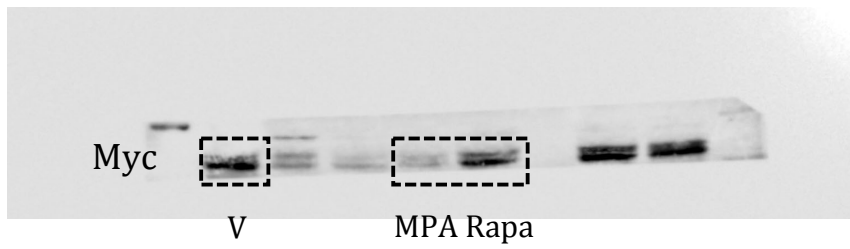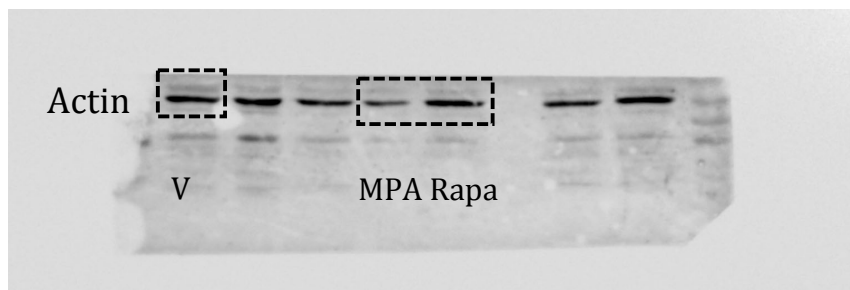

## Supplementary Figure 2

**Figure S2. MPA inhibits guanine, GMP and GTP or GDP but not pyrimidines.** High Performance Liquid Chromatography was used to profile purines and pyrimidines molecules in T cells. Values were normalized by mg of proteins of intracellular levels of guanine, GTP/GDP (no differentiation by HPLC), CTP/CDP (no differentiation by HPLC), UTP, UDP, fumarate, SAM (S-adenosylmethionine) and nicotinamide after 2 h, 4 h, 6 h and 16 hours of incubation with vehicle (V, black) or 0.5  $\mu$ M MPA (white). The data is from three independent experiments.

Supplementary Figure 2

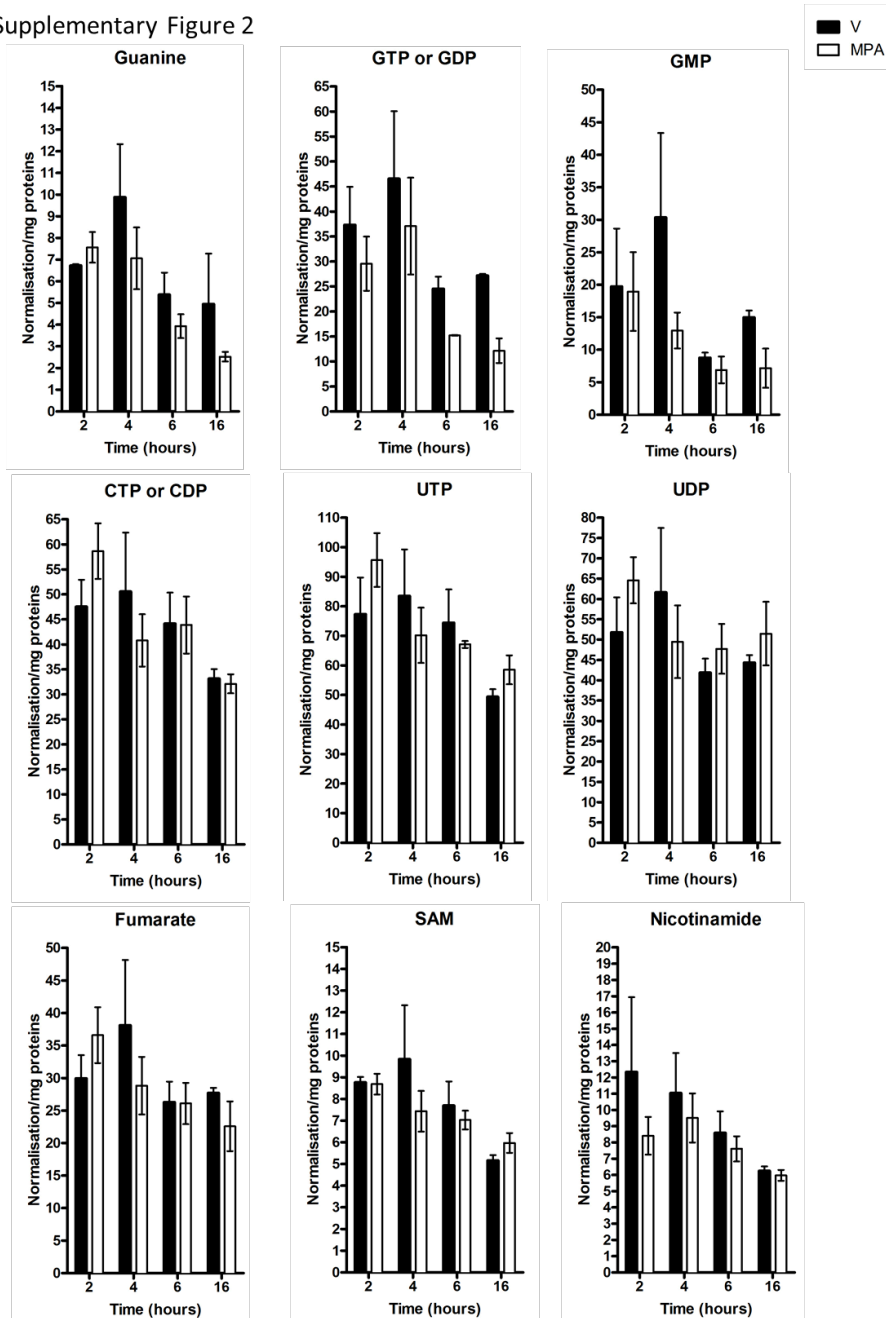

## Supplementary Methods

**Supplementary Table 1.** Primer sequences used for RT-PCR analysis

| Gene name | Primer sequence                                                   |
|-----------|-------------------------------------------------------------------|
| GPI       | F 5'-ccaccagcagacacacatca-3'<br>R 5'-cctgtgcactagtgcggcttc-3'     |
| HK2       | F 5'-tggcagacctcatcttccttc-3'<br>R 5'-aaacacacagtggaaactggc-3'    |
| PFKFB3    | F 5'-ggtgtgcgacgaccctac-3'<br>R 5'-gtacacgatgaggctctg-3'          |
| PKM       | F 5'-cgggataaccttgaggctga-3'<br>R 5'-gaagagatccggagccacg-3'       |
| SLC2A1    | F 5'-tatgtggagcaactgtgtgt-3'<br>R 5'-tccggccttagtctcagga-3'       |
| SLC2A3    | F 5'-gacacagaaggcaccacag-3'<br>R 5'-gacgaagagtccgacggaaa-3'       |
| ENO1      | F 5'-tccggctcaccggctctatc-3'<br>R 5'-ggagagccgtcactcattcc-3'      |
| TPI       | F 5'-cgtgggggaaactggaagat-3'<br>R 5'-aaaccacctcgggtgcggc-3'       |
| LDHA      | F 5'-acgtcagcatagctgtgcaa-3'<br>R 5'-aggaatcgggaatgcacgtc-3'      |
| LDHB      | F 5'-gcctcctctcctgtgcaa-3'<br>R 5'-cctctctccgcaactggt-3'          |
| MCT1      | F 5'-ggttataaggcagcctcg-3'<br>R 5'-ttgctgttccagtaccacg-3'         |
| GLS1      | F 5'-tcccaaggacagggtggaat-3'<br>R 5'-gagggtgtgtggacttgg-3'        |
| SLC1A5    | F 5'-tggactggctagtgcaccg-3'<br>R 5'-gggcagctcactctcactt-3'        |
| SLC38A1   | F 5'-gggatttgggactgcctt-3'<br>R 5'-tacaccatgcagcctgttct-3'        |
| SLC3A2    | F 5'-gggcctggactcttctcta-3'<br>R 5'-ggccacatcccaaagtta-3'         |
| GLUD1     | F 5'-gtaactgcatggctaacctgg-3'<br>R 5'-tctgggcagctcacaataaag-3'    |
| HGPRT     | F 5'-tgcttccttggcaggca-3'<br>R 5'-atccaacactcgtggggc-3'           |
| IMPDH1    | F 5'-gtctgccttcggccatga-3'<br>R 5'-gccgctttcgtaagagtgc-3'         |
| IMPDH2    | F 5'-tggaggcaatgtggtcactg-3'<br>R 5'-gccagcacttctcgta-3'          |
| CAD       | F 5'-ggagttgcagctcctccg-3'<br>R 5'-gccggttgaaacaccactt-3'         |
| G6PD      | F 5'-cgacgacgacgacgaagcgcaga-3'<br>R 5'-ggccaggtcaccgatgcac-3'    |
| TKT       | F 5'-tgtgtccagtgcagtgtgg-3'<br>R 5'-acactcatacccgccctag-3'        |
| RPL13A    | F 5'-cctggaggagaagaggaaagaga-3'<br>R 5'-gaggacctctgtgtattgtcaa-3' |



**Supplementary table 2.** Primary antibodies used for Western blot

| <b>Antibody</b>                            | <b>Dilution</b> | <b>Reference</b>         |
|--------------------------------------------|-----------------|--------------------------|
| Anti- $\beta$ actin                        | 1:10000         | A2668 <sup>1</sup>       |
| Anti-Phospho-p70 S6 Kinase (Thr421/Ser424) | 1:1000          | 9204 <sup>2</sup>        |
| Anti-HIF-1 alpha                           | 1:1000          | NB100-449 <sup>3</sup>   |
| Anti-c-Myc                                 | 1:1000          | 5605 <sup>2</sup>        |
| Anti-AMPK $\alpha$                         | 1:1000          | 2532 <sup>2</sup>        |
| Anti-Phospho-AMPK $\alpha$ (Thr172)        | 1:1000          | 2535 <sup>2</sup>        |
| Anti-Glut1                                 | 1:1000          | NB110-39113 <sup>3</sup> |
| Anti-Glut3                                 | 1:1000          | NBP1-89762 <sup>3</sup>  |
| Anti-LC3B                                  | 1:2000          | 2775 <sup>2</sup>        |

<sup>1</sup> Sigma-Aldrich

<sup>2</sup> Cell Signalling Technology

<sup>3</sup> Novus Biologicals
